# Supplementary material for: Association of ultra-processed food consumption with incident depression and anxiety: a population-based cohort study
Source: Royal Society of Chemistry journal article supplement (doi:10.1039/d3fo01120h), 2023-01-01
Supplement: d3fo01120h1.pdf [file d3fo01120h1.pdf]

## Supplementary method

### Covariates

We considered other covariates including age, sex (male and female), ethnicity (White, others), smoking (Never, Previous, Current smoking), alcohol consumption (Never, Special occasions only, One to three times a month, Once or twice a week, Three or four times a week, Daily or almost daily), Townsend deprivation index (TDI), income (<31000, ≥31000), education level (College or University degree, Others), and physical activity. In the sensitivity analysis, body mass index ( $BMI < 18.5$ ,  $18.5 \leq BMI < 25$ ,  $25 \leq BMI < 30$ ,  $BMI \geq 30$ ), the number of multimorbidity (none, 1, or  $\geq 2$ ), depression symptoms, and anxiety symptoms are further adjusted. Physical activity was assessed at baseline using the self-reported short-form international physical activity questionnaire (IPAQ). The IPAQ questions participants on three types of activity (walking, moderate, and vigorous-intensity activities). From these questions, the total physical activity volume can be computed in metabolic equivalent minutes per week (MET-min/week)<sup>1</sup>. According to the postal code of each participant, the Townsend deprivation index (TDI), was described through households without a car, overcrowded households, households not owner-occupied, and persons unemployed<sup>2</sup>. A number of morbidities, based on 43 commonly long-term conditions<sup>3</sup>, were categorized into none, one, and two or more. We further considered adjusting the analyses for depressive and anxiety symptoms. PHQ-2 was used to assess depressive symptoms at baseline. The questionnaire asked respondents about the frequency of “depression mood” (UK Biobank code: 2050) and “unenthusiasm/disinterest” (UK Biobank code: 2060) in the past two weeks. The response options included “not at all” (assigned a score of 0), “several days” (1), “more than half the days” (2), and “nearly every day” (3). Therefore, the score range of the questionnaire can be from 0 to 6, where 3 scores and above indicated that depression may occur<sup>4</sup>. GAD-7 is a classification scale focusing on seven anxious symptoms and signs, with a total score (0–21). (detailed Field ID in UK Biobank: Feeling nervous, anxious or on edge 20506, Not being able to stop or control worrying 20509, Worrying too much about different things 20520, Trouble relaxing 20515, Being so restless that it is hard to sit still 20516, Becoming easily annoyed or irritable 20505, Feeling afraid as if something awful might happen 20512). The selection criteria are as follows: anxiety GAD scores  $\leq 5$ <sup>5</sup>. More detailed information about these covariates could be discovered in the UK Biobank Showcase (<http://biobank.ndph.ox.ac.uk/showcase>

### Multiple imputation procedure

We used multiple imputation by two procedure steps “PROC MI” and “PROC MIANALYZE” in SAS to handle missing data on all covariates. In detail, we imputed missing data using multiple imputations by chained equations<sup>6</sup>. Due to the computational burden of using UK Biobank data, we imputed 5 complete datasets, and the maximum iteration was set to 20, though we generally realized that more imputation sets would be preferable. We used predictive mean matching to impute continuous variables and logistic regression for binary variables. All covariates were included in the multiple imputation model regardless of whether they were

missing or not <sup>7</sup>. We performed all analyses with each of the 5 imputed datasets one by one using the same analytic methods. Then the 5 results sets were pooled using Rubin's rule into a single set that accounts for the uncertainty caused by missing values and multiple imputations

**Supplementary Table 1. UPF items in the UK Biobank**

| Data field | Food item                                                   | Portion size                     | Energy   | energy for one serving |
|------------|-------------------------------------------------------------|----------------------------------|----------|------------------------|
|            |                                                             | g/serving                        | KJ/100 g | KJ/serving             |
| 100160     | Low calorie drink intake                                    | 330                              | 43       | 141.90                 |
| 100170     | Fizzy drink intake carbonated (fizzy) drinks                | 330                              | 174      | 574.20                 |
| 100180     | Squash intake                                               | 250                              | 159      | 397.50                 |
| 100250     | Instant coffee intake                                       | 190                              | 8        | 15.20                  |
| 100380     | Intake of artificial sweetener added to coffee <sup>c</sup> | 6                                | 200      | 12.00                  |
| 100500     | Intake of artificial sweetener added to tea <sup>d</sup>    | 6                                | 200      | 12.00                  |
| 100530     | Flavoured milk intake                                       | 250                              | 270      | 675.00                 |
| 100720     | Fortified wine intake                                       | 50                               | 481      | 240.50                 |
| 100730     | Spirits intake                                              | 23                               | 919      | 211.37                 |
| 100770     | Porridge intake                                             | 203.5                            | 195      | 396.83                 |
| 100800     | muesli intake                                               | 100                              | 1540     | 1540.00                |
| 100810     | Oat crunch intake                                           | 100                              | 1639     | 1639.00                |
| 100820     | Sweetened cereal intake                                     | 38                               | 1632     | 620.16                 |
| 100830     | Plain cereal intake                                         | 30                               | 1601     | 480.30                 |
| 100840     | Bran cereal intake                                          | 50                               | 1406     | 703.00                 |
| 100850     | Whole-wheat cereal intake                                   | 44                               | 1474     | 648.56                 |
| 100860     | Other cereal intake                                         | 44                               | 1566     | 689.04                 |
| 101090     | Bap intake                                                  | 90                               | 1065     | 958.50                 |
| 101160     | Bread roll intake                                           | 60                               | 1084     | 650.40                 |
| 101230     | Naan bread intake                                           | 160                              | 1206     | 1929.60                |
| 101250     | Crispbread intake                                           | 10                               | 1591     | 159.10                 |
| 101260     | Oatcakes intake                                             | 13                               | 1737     | 225.81                 |
| 101270     | Other bread intake                                          | 45                               | 1661     | 747.45                 |
| 101310     | Number of bread slices with butter/margarine                |                                  |          | 306.10/367.32/459.15   |
| 101350     | Number of baguettes with butter/margarine                   |                                  |          | 306.10/367.32/459.15   |
| 101390     | Number of baps with butter/margarine                        |                                  |          | 306.10/367.32/459.15   |
| 101430     | Number of bread rolls with butter/margarine                 | Thin 10<br>medium 12<br>thick 15 | 3061     | 306.10/367.32/459.15   |
| 101470     | Number of crackers/crispbreads with butter/margarine        |                                  |          | 306.10/367.32/459.15   |
| 101510     | Number of oatcakes with butter/margarine                    |                                  |          | 306.10/367.32/459.15   |
| 101550     | Number of other bread types with butter/margarine           |                                  |          | 306.10/367.32/459.15   |
| 101970     | Double crust pastry intake                                  | 60                               | 1060     | 636.00                 |
| 101980     | Single crust pastry intake                                  | 30                               | 1310     | 393.00                 |
| 101990     | Crumble intake                                              | 70                               | 924      | 646.80                 |
| 102000     | Pizza intake                                                | 150                              | 1036     | 1554.00                |
| 102010     | Pancake intake                                              | 110                              | 1065     | 1171.50                |
| 102020     | Scotch pancake intake                                       | 41                               | 1138     | 466.58                 |
| 102030     | Yorkshire pudding intake                                    | 25                               | 881      | 220.25                 |
| 102040     | Indian snacks intake                                        | 40                               | 975      | 390.00                 |
| 102050     | Croissant intake                                            | 60                               | 1563     | 937.80                 |
| 102060     | Danish pastry intake                                        | 110                              | 1441     | 1585.10                |
| 102070     | Scone intake                                                | 48                               | 1378     | 661.44                 |
| 102120     | Ice-cream intake                                            | 120                              | 1229     | 1474.80                |
| 102140     | Milk-based pudding intake                                   | 200                              | 494      | 988.00                 |
| 102150     | Other milk-based pudding intake                             | 60                               | 518      | 310.80                 |
| 102170     | Soya dessert intake                                         | 125                              | 309      | 386.25                 |
| 102180     | Fruitcake intake                                            | 70                               | 1478     | 1034.60                |
| 102190     | Cake intake                                                 | 60                               | 1617     | 970.20                 |
| 102200     | Doughnut intake                                             | 60                               | 1414     | 848.40                 |
| 102210     | Sponge pudding intake                                       | 120                              | 1116     | 1339.20                |
| 102220     | Cheesecake intake                                           | 110                              | 1231     | 1354.10                |
| 102230     | Other dessert intake                                        | 60                               | 696      | 417.60                 |
| 102260     | Chocolate bar intake                                        | 50                               | 2081     | 1040.50                |
| 102270     | White chocolate intake                                      | 50                               | 2212     | 1106.00                |
| 102280     | Milk chocolate intake                                       | 50                               | 2177     | 1088.50                |
| 102290     | Dark chocolate intake                                       | 50                               | 2273     | 1136.50                |
| 102300     | Chocolate-covered raisin intake                             | 25                               | 1159     | 289.75                 |
| 102310     | Chocolate sweet intake                                      | 36                               | 1922     | 691.92                 |
| 102320     | Diet sweets intake                                          | 18                               | 975      | 175.50                 |
| 102330     | Sweets intake                                               | 36                               | 1793     | 645.48                 |
| 102340     | Chocolate-covered biscuits intake                           | 17                               | 2076     | 352.92                 |
| 102350     | Chocolate biscuits intake                                   | 24                               | 2071     | 497.04                 |
| 102360     | Sweet biscuits intake                                       | 17                               | 1842     | 313.14                 |
| 102370     | Cereal bar intake                                           | 28                               | 1525     | 427.00                 |
| 102380     | Other sweets intake sweet snacks                            | 40                               | 1793     | 717.20                 |

|        |                                                                                      |     |      |         |
|--------|--------------------------------------------------------------------------------------|-----|------|---------|
| 102460 | Crisp intake                                                                         | 40  | 2186 | 874.40  |
| 102470 | Savoury biscuits intake                                                              | 40  | 2168 | 867.20  |
| 102480 | Cheesy biscuits intake                                                               | 40  | 1366 | 546.40  |
| 102500 | Other savoury snack intake                                                           | 40  | 2099 | 839.60  |
| 102530 | Powdered/instant soup intake                                                         | 200 | 270  | 540.00  |
| 102760 | Snackpot intake (snack pot, noodles/rice                                             | 280 | 1541 | 4314.80 |
| 102770 | Couscous intake                                                                      | 150 | 1440 | 2160.00 |
| 102850 | Low fat cheese spread intake                                                         | 40  | 733  | 293.20  |
| 102860 | Cheese spread intake                                                                 | 15  | 1106 | 165.90  |
| 103010 | Sausage intake                                                                       | 30  | 1218 | 365.40  |
| 103050 | Crumbed or deep-fried poultry intake (chicken or turkey in breadcrumbs or deep fried | 100 | 1111 | 1111.00 |
| 103070 | Bacon intake                                                                         | 46  | 891  | 409.86  |
| 103080 | Ham intake                                                                           | 23  | 891  | 204.93  |
| 103260 | Vegetarian sausages/burgers intake                                                   | 90  | 748  | 673.20  |
| 103280 | Quorn intake                                                                         | 90  | 389  | 350.10  |
| 103290 | Other vegetarian alternative intake                                                  | 90  | 1386 | 1247.40 |
| 104000 | Baked bean intake                                                                    | 135 | 335  | 452.25  |
| 104020 | Fried potatoes intake                                                                | 180 | 796  | 1432.80 |
| 104050 | Mashed potato intake                                                                 | 60  | 438  | 262.8   |

---

**Supplementary Table 2.** Baseline characteristics by UPF consumption(servings).

| Characteristics               | UPF consumption(servings) |                |                |                |
|-------------------------------|---------------------------|----------------|----------------|----------------|
|                               | Quartile 1                | Quartile 2     | Quartile 3     | Quartile 4     |
| Age (mean (SD))               | 55.9(7.8)                 | 56.2(7.9)      | 56.4(8.0)      | 56.3(8.1)      |
| Sex (%)                       |                           |                |                |                |
| Female                        | 31649 (64.6)              | 25230 (59.0)   | 24177 (51.8)   | 17865 (39.7)   |
| Male                          | 17325 (35.4)              | 17558 (41.0)   | 22481 (48.2)   | 27189 (60.3)   |
| Ethnicity (%)                 |                           |                |                |                |
| White                         | 45249 (92.4)              | 41042 (95.9)   | 45219 (96.9)   | 43927 (97.5)   |
| Others                        | 3725 (7.6)                | 1746 (4.1)     | 1439 (3.1)     | 1127 (2.5)     |
| Education (%)                 |                           |                |                |                |
| >=College                     | 24258 (49.5)              | 19616 (45.8)   | 19203 (41.2)   | 15739 (34.9)   |
| <College                      | 24716 (50.5)              | 23172 (54.2)   | 27455 (58.8)   | 29315 (65.1)   |
| Income (%)                    |                           |                |                |                |
| <31000                        | 17176 (35.1)              | 16074 (37.6)   | 18979 (40.7)   | 20408 (45.3)   |
| >=31000                       | 31798 (64.9)              | 26714 (62.4)   | 27679 (59.3)   | 24646 (54.7)   |
| Townsend deprivation index    | -1.4(3.0)                 | -1.7(2.8)      | -1.8(2.7)      | -1.7(2.8)      |
| Smoking (%)                   |                           |                |                |                |
| Never                         | 28949 (59.1)              | 25372 (59.3)   | 26775 (57.4)   | 23797 (52.8)   |
| Previous                      | 16877 (34.5)              | 14668 (34.3)   | 16491 (35.3)   | 16838 (37.4)   |
| Current                       | 3148 (6.4)                | 2748 (6.4)     | 3392 (7.3)     | 4419 (9.8)     |
| Drinking (%)                  |                           |                |                |                |
| Daily or almost daily         | 12392 (25.3)              | 10352 (24.2)   | 10460 (22.4)   | 9165 (20.3)    |
| Three or four times a week    | 12818 (26.2)              | 11293 (26.4)   | 12057 (25.8)   | 10646 (23.6)   |
| Once or twice a week          | 11557 (23.6)              | 10539 (24.6)   | 12074 (25.9)   | 11945 (26.5)   |
| One to three times a month    | 4657 (9.5)                | 4498 (10.5)    | 5218 (11.2)    | 5539 (12.3)    |
| Special occasions only        | 4482 (9.2)                | 3833 (9.0)     | 4300 (9.2)     | 4916 (10.9)    |
| Never                         | 3068 (6.3)                | 2273 (5.3)     | 2549 (5.5)     | 2843 (6.3)     |
| Physical activity (mean (SD)) | 2499.5(2369.8)            | 2460.8(2388.0) | 2505.6(2439.3) | 2603.2(2612.3) |

Abbreviations: SD, standard deviation.

**Supplementary Table 3.** Baseline characteristics by UPF consumption (energy ratio).

| Characteristics               | UPF consumption (energy ratio) |                |                |                |
|-------------------------------|--------------------------------|----------------|----------------|----------------|
|                               | Quartile 1                     | Quartile 2     | Quartile 3     | Quartile 4     |
| Age (mean (SD))               | 56.5(7.8)                      | 56.6(7.8)      | 56.3(8.0)      | 55.4(8.3)      |
| Sex (%)                       |                                |                |                |                |
| Female                        | 27356 (59.6)                   | 25537 (55.7)   | 23853 (52.0)   | 22175 (48.3)   |
| Male                          | 18513 (40.4)                   | 20331 (44.3)   | 22016 (48.0)   | 23693 (51.7)   |
| Ethnicity (%)                 |                                |                |                |                |
| White                         | 42939 (93.6)                   | 44109 (96.2)   | 44317 (96.6)   | 44072 (96.1)   |
| Others                        | 2930 (6.4)                     | 1759 (3.8)     | 1552 (3.4)     | 1796 (3.9)     |
| Education (%)                 |                                |                |                |                |
| $\geq$ College                | 21742 (47.4)                   | 21356 (46.6)   | 19663 (42.9)   | 16055 (35.0)   |
| <College                      | 24127 (52.6)                   | 24512 (53.4)   | 26206 (57.1)   | 29813 (65.0)   |
| Income (%)                    |                                |                |                |                |
| <31000                        | 16633 (36.3)                   | 17307 (37.7)   | 18346 (40.0)   | 20351 (44.4)   |
| $\geq$ 31000                  | 29236 (63.7)                   | 28561 (62.3)   | 27523 (60.0)   | 25517 (55.6)   |
| Townsend deprivation index    | -1.4(3.0)                      | -1.7(2.8)      | -1.8(2.7)      | -1.6(2.9)      |
| Smoking (%)                   |                                |                |                |                |
| Never                         | 24471 (53.3)                   | 26084 (56.9)   | 27097 (59.1)   | 27241 (59.4)   |
| Previous                      | 17743 (38.7)                   | 16730 (36.5)   | 15695 (34.2)   | 14706 (32.1)   |
| Current                       | 3655 (8.0)                     | 3054 (6.7)     | 3077 (6.7)     | 3921 (8.5)     |
| Drinking (%)                  |                                |                |                |                |
| Daily or almost daily         | 14315 (31.2)                   | 12179 (26.6)   | 9643 (21.0)    | 6232 (13.6)    |
| Three or four times a week    | 12393 (27.0)                   | 12788 (27.9)   | 12059 (26.3)   | 9574 (20.9)    |
| Once or twice a week          | 9702 (21.2)                    | 11010 (24.0)   | 12259 (26.7)   | 13144 (28.7)   |
| One to three times a month    | 3718 (8.1)                     | 4222 (9.2)     | 5132 (11.2)    | 6840 (14.9)    |
| Special occasions only        | 3522 (7.7)                     | 3553 (7.7)     | 4278 (9.3)     | 6178 (13.5)    |
| Never                         | 2219 (4.8)                     | 2116 (4.6)     | 2498 (5.4)     | 3900 (8.5)     |
| Physical activity (mean (SD)) | 2605.2(2470.4)                 | 2523.9(2409.5) | 2476.3(2412.6) | 2464.5(2518.1) |

Abbreviations: SD, standard deviation.

**Supplementary Table 4.** Baseline characteristics by UPF consumption (weight ratio).

| Characteristics               | UPF consumption (weight ratio) |                |                |                |
|-------------------------------|--------------------------------|----------------|----------------|----------------|
|                               | Quartile 1                     | Quartile 2     | Quartile 3     | Quartile 4     |
| Age (mean (SD))               | 56.3(7.8)                      | 56.5(7.9)      | 56.5(8.0)      | 55.5(8.2)      |
| Sex (%)                       |                                |                |                |                |
| Female                        | 27069 (59.0)                   | 25317 (55.2)   | 23873 (52.0)   | 22662 (49.4)   |
| Male                          | 18800 (41.0)                   | 20551 (44.8)   | 21996 (48.0)   | 23206 (50.6)   |
| Ethnicity (%)                 |                                |                |                |                |
| White                         | 43299 (94.4)                   | 43816 (95.5)   | 44076 (96.1)   | 44246 (96.5)   |
| Others                        | 2570 (5.6)                     | 2052 (4.5)     | 1793 (3.9)     | 1622 (3.5)     |
| Education (%)                 |                                |                |                |                |
| $\geq$ College                | 23995 (52.3)                   | 21106 (46.0)   | 18322 (39.9)   | 15393 (33.6)   |
| <College                      | 21874 (47.7)                   | 24762 (54.0)   | 27547 (60.1)   | 30475 (66.4)   |
| Income (%)                    |                                |                |                |                |
| <31000                        | 15866 (34.6)                   | 17720 (38.6)   | 18967 (41.4)   | 20084 (43.8)   |
| $\geq$ 31000                  | 30003 (65.4)                   | 28148 (61.4)   | 26902 (58.6)   | 25784 (56.2)   |
| Townsend deprivation index    | -1.3(3.0)                      | -1.7(2.8)      | -1.8(2.8)      | -1.7(2.8)      |
| Smoking (%)                   |                                |                |                |                |
| Never                         | 25747 (56.1)                   | 26960 (58.8)   | 26722 (58.3)   | 25464 (55.5)   |
| Previous                      | 17037 (37.1)                   | 16129 (35.2)   | 15909 (34.7)   | 15799 (34.4)   |
| Current                       | 3085 (6.7)                     | 2779 (6.1)     | 3238 (7.1)     | 4605 (10.0)    |
| Drinking (%)                  |                                |                |                |                |
| Daily or almost daily         | 13406 (29.2)                   | 11107 (24.2)   | 9909 (21.6)    | 7947 (17.3)    |
| Three or four times a week    | 12524 (27.3)                   | 12210 (26.6)   | 11928 (26.0)   | 10152 (22.1)   |
| Once or twice a week          | 9869 (21.5)                    | 11347 (24.7)   | 12203 (26.6)   | 12696 (27.7)   |
| One to three times a month    | 3924 (8.6)                     | 4689 (10.2)    | 5023 (11.0)    | 6276 (13.7)    |
| Special occasions only        | 3643 (7.9)                     | 4038 (8.8)     | 4294 (9.4)     | 5556 (12.1)    |
| Never                         | 2503 (5.5)                     | 2477 (5.4)     | 2512 (5.5)     | 3241 (7.1)     |
| Physical activity (mean (SD)) | 2566.5(2425.1)                 | 2518.8(2406.4) | 2520.0(2467.2) | 2464.8(2513.4) |

Abbreviations: SD, standard deviation.

**Supplementary Table 5.** Associations of UPF servings with depression and anxiety stratified by potential modifiers.

| Subgroups               | Depression         |                   | Anxiety            |                   |
|-------------------------|--------------------|-------------------|--------------------|-------------------|
|                         | HR 95%CI           | P for interaction | HR 95%CI           | P for interaction |
| Age                     |                    |                   |                    |                   |
| <60 years               | 1.36 (1.24 - 1.50) | 4.58E-05          | 1.22 (1.12 - 1.33) | 1.38E-02          |
| ≥60 years               | 1.03 (0.91 - 1.16) |                   | 1.02 (0.91 - 1.14) |                   |
| Sex                     |                    |                   |                    |                   |
| Male                    | 1.13 (1.00 - 1.29) | 0.781867          | 1.16 (1.02 - 1.31) | 0.40105017        |
| Female                  | 1.27 (1.16 - 1.40) |                   | 1.12 (1.03 - 1.22) |                   |
| Education level         |                    |                   |                    |                   |
| <College                | 1.15 (1.05 - 1.26) | 0.409999          | 1.06 (0.97 - 1.16) | 0.10751392        |
| ≥College                | 1.33 (1.17 - 1.51) |                   | 1.28 (1.13 - 1.43) |                   |
| PA (MET-minute/week)    |                    |                   |                    |                   |
| <500                    | 1.36 (1.15 - 1.62) | 0.186931          | 1.20 (1.01 - 1.42) | 0.569099379       |
| ≥500                    | 1.17 (1.08 - 1.28) |                   | 1.12 (1.03 - 1.20) |                   |
| Income                  |                    |                   |                    |                   |
| <31000                  | 1.10 (0.99 - 1.22) | 0.028905          | 0.99 (0.89 - 1.09) | 0.001623155       |
| ≥31000                  | 1.34 (1.20 - 1.50) |                   | 1.28 (1.17 - 1.42) |                   |
| Deprivation index       |                    |                   |                    |                   |
| Low                     | 1.17 (1.07 - 1.28) | 0.096789          | 1.18 (1.08 - 1.28) | 0.515933996       |
| High                    | 1.30 (1.14 - 1.48) |                   | 1.02 (0.90 - 1.16) |                   |
| Smoking status          |                    |                   |                    |                   |
| None-smokers            | 1.19 (1.07 - 1.33) | 0.729775          | 1.16 (1.05 - 1.28) | 0.471673639       |
| Current or ever smokers | 1.26 (1.13 - 1.39) |                   | 1.11 (1.01 - 1.23) |                   |
| Alcohol intake          |                    |                   |                    |                   |
| <3 times/week           | 1.13 (1.02 - 1.24) | 0.182186          | 1.07 (0.98 - 1.17) | 0.489478059       |
| ≥3 times/week           | 1.38 (1.22 - 1.55) |                   | 1.23 (1.10 - 1.37) |                   |

Abbreviations: UPF, ultra-processed food; CI, confidence interval; HR, hazard ratio; PA, physical activity.

HR was calculated by Cox model adjusted for age, sex, ethnicity, smoking, drinking, Townsend deprivation index, income, education, and physical activity.



**Supplementary Table 6.** Associations of UPF energy ratio with depression and anxiety stratified by potential modifiers.

| Subgroups                   | Depression         |                   | Anxiety            |                   |
|-----------------------------|--------------------|-------------------|--------------------|-------------------|
|                             | HR 95%CI           | P for interaction | HR 95%CI           | P for interaction |
| <b>Age</b>                  |                    |                   |                    |                   |
| <60 years                   | 1.21 (1.10 - 1.33) | 1.18E-02          | 1.13 (1.03 - 1.23) | 3.38E-01          |
| ≥60 years                   | 1.03 (0.91 - 1.17) |                   | 1.11 (0.99 - 1.24) |                   |
| <b>Sex</b>                  |                    |                   |                    |                   |
| Male                        | 1.08 (0.95 - 1.23) | 0.608508028       | 1.13 (1.00 - 1.27) | 0.435113663       |
| Female                      | 1.17 (1.06 - 1.28) |                   | 1.10 (1.01 - 1.19) |                   |
| <b>Education level</b>      |                    |                   |                    |                   |
| <College                    | 1.10 (1.00 - 1.20) | 0.196683461       | 1.04 (0.96 - 1.14) | 0.107370178       |
| ≥College                    | 1.18 (1.04 - 1.35) |                   | 1.26 (1.12 - 1.41) |                   |
| <b>PA (MET-minute/week)</b> |                    |                   |                    |                   |
| <500                        | 1.09 (0.92 - 1.29) | 0.694399303       | 1.09 (0.93 - 1.29) | 0.843099503       |
| ≥500                        | 1.13 (1.04 - 1.23) |                   | 1.11 (1.03 - 1.20) |                   |
| <b>Income</b>               |                    |                   |                    |                   |
| <31000                      | 1.05 (0.94 - 1.16) | 0.186234556       | 1.07 (0.97 - 1.18) | 0.747450115       |
| ≥31000                      | 1.23 (1.10 - 1.37) |                   | 1.15 (1.04 - 1.26) |                   |
| <b>Deprivation index</b>    |                    |                   |                    |                   |
| Low                         | 1.08 (0.98 - 1.18) | 0.008782147       | 1.11 (1.02 - 1.20) | 0.970961873       |
| High                        | 1.23 (1.08 - 1.40) |                   | 1.10 (0.97 - 1.25) |                   |
| <b>Smoking status</b>       |                    |                   |                    |                   |
| None-smokers                | 1.04 (0.93 - 1.16) | 0.032411211       | 1.12 (1.02 - 1.23) | 0.547752999       |
| Current or ever smokers     | 1.23 (1.11 - 1.37) |                   | 1.12 (1.01 - 1.24) |                   |
| <b>Alcohol intake</b>       |                    |                   |                    |                   |
| <3 times/week               | 1.03 (0.94 - 1.14) | 0.018829135       | 1.04 (0.95 - 1.14) | 0.142004453       |
| ≥3 times/week               | 1.33 (1.18 - 1.50) |                   | 1.22 (1.10 - 1.36) |                   |

Abbreviations: UPF, ultra-processed food; CI, confidence interval; HR, hazard ratio; PA, physical activity.

HR was calculated by Cox model adjusted for age, sex, ethnicity, smoking, drinking, Townsend deprivation index, income, education, and physical activity.

**Supplementary Table 7.** Associations of UPF weight ratio with depression and anxiety stratified by potential modifiers.

| Subgroups                   | Depression         |                   | Anxiety            |                   |
|-----------------------------|--------------------|-------------------|--------------------|-------------------|
|                             | HR 95%CI           | P for interaction | HR 95%CI           | P for interaction |
| <b>Age</b>                  |                    |                   |                    |                   |
| <60 years                   | 1.48 (1.34 - 1.63) | 8.51E-08          | 1.15 (1.05 - 1.26) | 3.62E-01          |
| ≥60 years                   | 0.98 (0.87 - 1.11) |                   | 1.11 (1.00 - 1.24) |                   |
| <b>Sex</b>                  |                    |                   |                    |                   |
| Male                        | 1.25 (1.10 - 1.43) | 0.608508028       | 1.14 (1.01 - 1.28) | 0.56826735        |
| Female                      | 1.26 (1.15 - 1.39) |                   | 1.12 (1.03 - 1.21) |                   |
| <b>Education level</b>      |                    |                   |                    |                   |
| <College                    | 1.13 (1.03 - 1.24) | 0.003131387       | 1.08 (0.99 - 1.18) | 0.355779526       |
| ≥College                    | 1.49 (1.31 - 1.70) |                   | 1.20 (1.07 - 1.35) |                   |
| <b>PA (MET-minute/week)</b> |                    |                   |                    |                   |
| <500                        | 1.13 (0.95 - 1.35) | 0.550858682       | 1.04 (0.88 - 1.23) | 0.586815405       |
| ≥500                        | 1.28 (1.17 - 1.39) |                   | 1.14 (1.06 - 1.23) |                   |
| <b>Income</b>               |                    |                   |                    |                   |
| <31000                      | 1.23 (1.10 - 1.37) | 0.603824369       | 1.05 (0.95 - 1.16) | 0.170180486       |
| ≥31000                      | 1.29 (1.16 - 1.44) |                   | 1.20 (1.09 - 1.32) |                   |
| <b>Deprivation index</b>    |                    |                   |                    |                   |
| Low                         | 1.18 (1.08 - 1.30) | 0.061232719       | 1.14 (1.05 - 1.24) | 0.972199595       |
| High                        | 1.39 (1.22 - 1.59) |                   | 1.08 (0.95 - 1.22) |                   |
| <b>Smoking status</b>       |                    |                   |                    |                   |
| None-smokers                | 1.22 (1.10 - 1.36) | 0.154006328       | 1.17 (1.06 - 1.28) | 0.476550304       |
| Current or ever smokers     | 1.32 (1.19 - 1.47) |                   | 1.09 (0.99 - 1.21) |                   |
| <b>Alcohol intake</b>       |                    |                   |                    |                   |
| <3 times/week               | 1.19 (1.08 - 1.32) | 0.255453338       | 1.10 (1.01 - 1.21) | 0.838861982       |
| ≥3 times/week               | 1.35 (1.20 - 1.52) |                   | 1.16 (1.04 - 1.30) |                   |

Abbreviations: UPF, ultra-processed food; CI, confidence interval; HR, hazard ratio; PA, physical activity.

HR was calculated by the Cox model adjusted for age, sex, ethnicity, smoking, drinking, Townsend deprivation index, income, education, and physical activity.

**Supplementary Table 8.** Associations between UPF consumption and transitions from baseline to depression or anxiety, and then to death when using age as time-scale.

|                          |                     | Depression |                       |          | Anxiety          |             |                       |          |
|--------------------------|---------------------|------------|-----------------------|----------|------------------|-------------|-----------------------|----------|
|                          |                     | Case       | HR (95% CI)           | P-value  | Case             | HR (95% CI) | P-value               |          |
| <b>Servings</b>          |                     |            |                       |          |                  |             |                       |          |
|                          | Baseline→Depression | 5453       | 1.2325(1.1434,1.3285) | 4.73e-08 | Baseline→Anxiety | 6763        | 1.1374(1.0615,1.2188) | 0.000261 |
|                          | Depression→Death    | 609        | 0.8597(0.6923,1.0678) | 0.171659 | Anxiety→Death    | 583         | 0.9662(0.7660,1.2186) | 0.771326 |
|                          | Baseline→Death      | 8608       | 1.0970(1.0328,1.1651) | 0.002615 | Baseline→Death   | 8634        | 1.0929(1.0293,1.1605) | 0.003683 |
| <b>Energy proportion</b> |                     |            |                       |          |                  |             |                       |          |
|                          | Baseline→Depression | 5453       | 1.1612(1.0767,1.2524) | 0.000105 | Baseline→Anxiety | 6763        | 1.1388(1.0632,1.2197) | 0.000207 |
|                          | Depression→Death    | 609        | 0.9737(0.7811,1.2138) | 0.812918 | Anxiety→Death    | 583         | 0.8061(0.6423,1.0117) | 0.062963 |
|                          | Baseline→Death      | 8608       | 1.0192(0.9587,1.0835) | 0.542677 | Baseline→Death   | 8634        | 1.0325(0.9713,1.0975) | 0.304942 |
| <b>Weight proportion</b> |                     |            |                       |          |                  |             |                       |          |
|                          | Baseline→Depression | 5453       | 1.2888(1.1940,1.3911) | 7.54e-11 | Baseline→Anxiety | 6763        | 1.1240(1.0491,1.2042) | 0.000890 |
|                          | Depression→Death    | 609        | 0.8478(0.6767,1.0621) | 0.150991 | Anxiety→Death    | 583         | 1.0123(0.8032,1.2758) | 0.917622 |
|                          | Baseline→Death      | 8608       | 1.0965(1.0314,1.1656) | 0.003165 | Baseline→Death   | 8634        | 1.0918(1.0272,1.1606) | 0.004798 |

Abbreviations: UPF, ultra-processed food; CI, confidence interval; HR, hazard ratio.

HR was calculated by the Cox model adjusted for sex, ethnicity, smoking, drinking, Townsend deprivation index, income, education, and physical activity.

**Supplementary Table 9.** Sensitivity analyses for the association between UPF intake and risk of depression or anxiety when only included participants with at least two completed 24h recall questionnaires.

|         | Depression        |                    |             |             | Anxiety            |             |   |
|---------|-------------------|--------------------|-------------|-------------|--------------------|-------------|---|
|         | case/person years | HR 95%CI           | P           |             | case/person years  | HR 95%CI    | P |
| Serving |                   |                    |             |             |                    |             |   |
| Q1      | 662/367768        | Ref                |             | 869/366174  | Ref                |             |   |
| Q2      | 635/356554        | 1.01 (0.91 - 1.13) | 0.856420433 | 951/354534  | 1.15 (1.05 - 1.26) | 0.002635622 |   |
| Q3      | 750/364227        | 1.18 (1.06 - 1.31) | 0.002742818 | 973/362719  | 1.17 (1.07 - 1.28) | 0.000941418 |   |
| Q4      | 844/352217        | 1.36 (1.22 - 1.51) | 1.69E-08    | 933/351453  | 1.17 (1.07 - 1.29) | 0.001038351 |   |
| P-trend |                   |                    | 4.71E-10    |             |                    | 0.001280362 |   |
| Energy% |                   |                    |             |             |                    |             |   |
| Q1      | 643/360523        | Ref                |             | 852/359234  | Ref                |             |   |
| Q2      | 685/361085        | 1.09 (0.97 - 1.21) | 0.135836626 | 934/359094  | 1.12 (1.02 - 1.23) | 0.016517626 |   |
| Q3      | 710/359936        | 1.12 (1.00 - 1.25) | 0.041953648 | 919/358551  | 1.10 (1.00 - 1.21) | 0.0492662   |   |
| Q4      | 853/359222        | 1.26 (1.13 - 1.40) | 2.17E-05    | 1021/358002 | 1.17 (1.06 - 1.28) | 0.001456484 |   |
| P-trend |                   |                    | 2.43E-05    |             |                    | 0.004111905 |   |
| Weight% |                   |                    |             |             |                    |             |   |
| Q1      | 616/360972        | Ref                |             | 862/359255  | Ref                |             |   |
| Q2      | 671/360755        | 1.11 (0.99 - 1.24) | 0.068945841 | 920/359083  | 1.08 (0.98 - 1.18) | 0.12537193  |   |
| Q3      | 689/360140        | 1.13 (1.02 - 1.27) | 0.024929208 | 906/358626  | 1.06 (0.96 - 1.16) | 0.244428215 |   |
| Q4      | 915/358899        | 1.41 (1.27 - 1.57) | 1.92E-10    | 1038/357917 | 1.15 (1.05 - 1.27) | 0.002857591 |   |
| P-trend |                   |                    | 2.38E-10    |             |                    | 0.006398676 |   |

Abbreviations: UPF, ultra-processed food; CI, confidence interval; HR, hazard ratio.

HR was calculated by the Cox model adjusted for age, sex, ethnicity, smoking, drinking, Townsend deprivation index, income, education, and physical activity.

**Supplementary Table 10.** Sensitivity analyses for the association between UPF intake and risk of depression or anxiety when further excluded participants who developed depression or anxiety within the first 2 years of the follow-up.

|         | Depression        |                    |             |             | Anxiety            |             |   |
|---------|-------------------|--------------------|-------------|-------------|--------------------|-------------|---|
|         | case/person years | HR 95%CI           | P           |             | case/person years  | HR 95%CI    | P |
| Serving |                   |                    |             |             |                    |             |   |
| Q1      | 1198/629890       | Ref                |             | 1445/628265 | Ref                |             |   |
| Q2      | 999/551944        | 0.97 (0.89 - 1.05) | 0.434054558 | 1379/549872 | 1.11 (1.03 - 1.20) | 0.004574942 |   |
| Q3      | 1184/599995       | 1.05 (0.97 - 1.14) | 0.238558856 | 1488/598278 | 1.11 (1.03 - 1.20) | 0.004122312 |   |
| Q4      | 1363/576043       | 1.23 (1.13 - 1.33) | 7.50E-07    | 1465/575319 | 1.15 (1.06 - 1.23) | 0.000394307 |   |
| P-trend |                   |                    | 1.65E-07    |             |                    | 0.000658176 |   |
| Energy% |                   |                    |             |             |                    |             |   |
| Q1      | 1147/589121       | Ref                |             | 1396/587760 | Ref                |             |   |
| Q2      | 1089/591355       | 0.97 (0.89 - 1.05) | 0.459085206 | 1375/589440 | 1.01 (0.94 - 1.09) | 0.823227343 |   |
| Q3      | 1136/589988       | 1.00 (0.92 - 1.09) | 0.977665363 | 1398/588610 | 1.02 (0.95 - 1.10) | 0.577266933 |   |
| Q4      | 1372/587408       | 1.12 (1.03 - 1.21) | 0.008042127 | 1608/585924 | 1.12 (1.04 - 1.20) | 0.003893341 |   |
| P-trend |                   |                    | 0.005229675 |             |                    | 0.004196821 |   |
| Weight% |                   |                    |             |             |                    |             |   |
| Q1      | 1051/590638       | Ref                |             | 1311/589190 | Ref                |             |   |
| Q2      | 1094/590669       | 1.05 (0.97 - 1.15) | 0.238494794 | 1444/588457 | 1.11 (1.03 - 1.20) | 0.00572893  |   |
| Q3      | 1167/589475       | 1.11 (1.02 - 1.20) | 0.018938104 | 1438/588066 | 1.10 (1.02 - 1.18) | 0.017493154 |   |
| Q4      | 1432/587091       | 1.26 (1.16 - 1.37) | 3.23E-08    | 1584/586020 | 1.15 (1.07 - 1.24) | 0.000314331 |   |
| P-trend |                   |                    | 1.19052E-08 |             |                    | 0.001105509 |   |

Abbreviations: UPF, ultra-processed food; CI, confidence interval; HR, hazard ratio.

HR was calculated by the Cox model adjusted for age, sex, ethnicity, smoking, drinking, Townsend deprivation index, income, education, and physical activity.

**Supplementary Table 11.** Sensitivity analyses for the association between UPF intake and risk of depression or anxiety when further excluded participants with cardiovascular disease (CVD), cancer, or chronic obstructive pulmonary disease (COPD) at baseline.

|         | Depression        |                    |             |             | Anxiety            |             |   |
|---------|-------------------|--------------------|-------------|-------------|--------------------|-------------|---|
|         | case/person years | HR 95%CI           | P           |             | case/person years  | HR 95%CI    | P |
| Serving |                   |                    |             |             |                    |             |   |
| Q1      | 777/405105        | Ref                |             | 991/403054  | Ref                |             |   |
| Q2      | 756/413134        | 0.97 (0.88 - 1.07) | 0.581730736 | 1084/410785 | 1.10 (1.01 - 1.20) | 0.030418527 |   |
| Q3      | 793/397561        | 1.06 (0.96 - 1.17) | 0.244845283 | 1073/395671 | 1.15 (1.05 - 1.25) | 0.002339047 |   |
| Q4      | 919/398101        | 1.22 (1.10 - 1.34) | 8.83841E-05 | 1061/396936 | 1.15 (1.05 - 1.26) | 0.002347232 |   |
| P-trend |                   |                    | 1.85922E-05 |             |                    | 0.001531053 |   |
| Energy% |                   |                    |             |             |                    |             |   |
| Q1      | 761/403516        | Ref                |             | 977/401788  | Ref                |             |   |
| Q2      | 758/404742        | 1.02 (0.92 - 1.13) | 0.695137897 | 1043/402393 | 1.09 (1.00 - 1.19) | 0.044334045 |   |
| Q3      | 781/403609        | 1.05 (0.95 - 1.16) | 0.355026251 | 1023/401811 | 1.07 (0.98 - 1.17) | 0.125515503 |   |
| Q4      | 945/402035        | 1.18 (1.07 - 1.31) | 0.000801746 | 1166/400454 | 1.16 (1.06 - 1.26) | 0.001047704 |   |
| P-trend |                   |                    | 0.000707715 |             |                    | 0.003057566 |   |
| Weight% |                   |                    |             |             |                    |             |   |
| Q1      | 712/404120        | Ref                |             | 992/401742  | Ref                |             |   |
| Q2      | 751/404301        | 1.07 (0.97 - 1.19) | 0.172619499 | 1028/402240 | 1.05 (0.96 - 1.15) | 0.272365533 |   |
| Q3      | 799/403469        | 1.13 (1.02 - 1.25) | 0.022224596 | 1048/401799 | 1.06 (0.97 - 1.16) | 0.182418174 |   |
| Q4      | 983/402012        | 1.29 (1.17 - 1.43) | 4.01E-07    | 1141/400665 | 1.10 (1.01 - 1.20) | 0.034633483 |   |
| P-trend |                   |                    | 2.4079E-07  |             |                    | 0.038297068 |   |

Abbreviations: UPF, ultra-processed food; CI, confidence interval; HR, hazard ratio.

HR was calculated by the Cox model adjusted for age, sex, ethnicity, smoking, drinking, Townsend deprivation index, income, education, and physical activity.

**Supplementary Table 12.** Sensitivity analyses for the association between UPF intake and risk of depression or anxiety when further adjusted for BMI and multimorbidity.

|         | Depression        |                    |             |             | Anxiety            |             |   |
|---------|-------------------|--------------------|-------------|-------------|--------------------|-------------|---|
|         | case/person years | HR 95%CI           | P           |             | case/person years  | HR 95%CI    | P |
| Serving |                   |                    |             |             |                    |             |   |
| Q1      | 1377/632999       | Ref                |             | 1717/630209 | Ref                |             |   |
| Q2      | 1145/554388       | 0.95 (0.88 - 1.03) | 0.202203389 | 1587/551514 | 1.07 (1.00 - 1.15) | 0.039086414 |   |
| Q3      | 1367/602917       | 1.03 (0.95 - 1.11) | 0.51820301  | 1743/600314 | 1.09 (1.02 - 1.17) | 0.013261606 |   |
| Q4      | 1564/578865       | 1.15 (1.06 - 1.24) | 0.000332851 | 1716/577598 | 1.10 (1.03 - 1.18) | 0.004961673 |   |
| P-trend |                   |                    | 7.63451E-05 |             |                    | 0.004843801 |   |
| Energy% |                   |                    |             |             |                    |             |   |
| Q1      | 1307/592205       | Ref                |             | 1608/590158 | Ref                |             |   |
| Q2      | 1253/594297       | 0.98 (0.91 - 1.06) | 0.58774648  | 1621/591420 | 1.03 (0.96 - 1.11) | 0.354297155 |   |
| Q3      | 1296/593098       | 0.99 (0.92 - 1.08) | 0.894861621 | 1653/590580 | 1.05 (0.98 - 1.12) | 0.206378062 |   |
| Q4      | 1597/589571       | 1.12 (1.04 - 1.21) | 0.003728062 | 1881/587477 | 1.12 (1.04 - 1.20) | 0.001450106 |   |
| P-trend |                   |                    | 0.003090146 |             |                    | 0.001704334 |   |
| Weight% |                   |                    |             |             |                    |             |   |
| Q1      | 1200/593680       | Ref                |             | 1572/590814 | Ref                |             |   |
| Q2      | 1262/593746       | 1.05 (0.97 - 1.14) | 0.219435803 | 1656/591005 | 1.06 (0.99 - 1.13) | 0.106660892 |   |
| Q3      | 1345/592408       | 1.09 (1.00 - 1.17) | 0.040578929 | 1686/590173 | 1.07 (0.99 - 1.14) | 0.071670084 |   |
| Q4      | 1646/589336       | 1.19 (1.10 - 1.29) | 6.89E-06    | 1849/587644 | 1.09 (1.02 - 1.17) | 0.011904723 |   |
| P-trend |                   |                    | 4.58789E-06 |             |                    | 0.015325368 |   |

Abbreviations: UPF, ultra-processed food; CI, confidence interval; HR, hazard ratio.

HR was calculated by the Cox model adjusted for age, sex, ethnicity, smoking, drinking, Townsend deprivation index, income, education, physical activity, BMI, and multimorbidity.



**Supplementary Table 13.** Sensitivity analyses for the association between UPF intake and risk of depression or anxiety when further adjusted for depression and anxiety symptoms at baseline.

| □       | Depression        |                    |             | □           | □                  | Anxiety           |          |   | □ |
|---------|-------------------|--------------------|-------------|-------------|--------------------|-------------------|----------|---|---|
|         | case/person years | HR 95%CI           | P           |             |                    | case/person years | HR 95%CI | P |   |
| Serving |                   |                    |             |             |                    |                   |          |   |   |
| Q1      | 1377/632999       | Ref                |             | 1717/630209 | Ref                |                   |          |   |   |
| Q2      | 1145/554388       | 0.96 (0.89 - 1.04) | 0.339554652 | 1587/551514 | 1.08 (1.01 - 1.15) | 0.034325425       |          |   |   |
| Q3      | 1367/602917       | 1.05 (0.97 - 1.13) | 0.216857053 | 1743/600314 | 1.09 (1.02 - 1.17) | 0.00860548        |          |   |   |
| Q4      | 1564/578865       | 1.20 (1.11 - 1.29) | 2.10E-06    | 1716/577598 | 1.12 (1.04 - 1.20) | 0.001406545       |          |   |   |
| P-trend |                   |                    | 3.13E-07    |             |                    | 0.001345516       |          |   |   |
| Energy% |                   |                    |             |             |                    |                   |          |   |   |
| Q1      | 1307/592205       | Ref                |             | 1608/590158 | Ref                |                   |          |   |   |
| Q2      | 1253/594297       | 0.98 (0.90 - 1.05) | 0.532086936 | 1621/591420 | 1.03 (0.96 - 1.10) | 0.409957036       |          |   |   |
| Q3      | 1296/593098       | 0.99 (0.91 - 1.06) | 0.704490456 | 1653/590580 | 1.04 (0.97 - 1.11) | 0.321053132       |          |   |   |
| Q4      | 1597/589571       | 1.12 (1.04 - 1.21) | 0.002727182 | 1881/587477 | 1.12 (1.04 - 1.20) | 0.001721579       |          |   |   |
| P-trend |                   |                    | 0.002618198 |             |                    | 0.002343044       |          |   |   |
| Weight% |                   |                    |             |             |                    |                   |          |   |   |
| Q1      | 1200/593680       | Ref                |             | 1572/590814 | Ref                |                   |          |   |   |
| Q2      | 1262/593746       | 1.06 (0.98 - 1.14) | 0.167642272 | 1656/591005 | 1.06 (0.99 - 1.13) | 0.120482093       |          |   |   |
| Q3      | 1345/592408       | 1.10 (1.02 - 1.20) | 0.013216215 | 1686/590173 | 1.06 (0.99 - 1.14) | 0.086069875       |          |   |   |
| Q4      | 1646/589336       | 1.25 (1.16 - 1.35) | 8.57E-09    | 1849/587644 | 1.11 (1.03 - 1.18) | 0.004416605       |          |   |   |
| P-trend |                   |                    | 3.69989E-09 |             |                    | 0.00609701        |          |   |   |

Abbreviations: UPF, ultra-processed food; CI, confidence interval; HR, hazard ratio.

HR was calculated by the Cox model adjusted for age, sex, ethnicity, smoking, drinking, Townsend deprivation index, income, education, physical activity, depression, and anxiety symptoms.

**Supplementary Table 14.** Associations between UPF consumption and transitions from baseline to depression or anxiety, and then to cancer mortality.

|                          |                     | Depression |                       |          | Anxiety          |             |                       |          |
|--------------------------|---------------------|------------|-----------------------|----------|------------------|-------------|-----------------------|----------|
|                          |                     | Case       | HR (95% CI)           | P-value  |                  |             | P-value               |          |
|                          |                     | Case       | HR (95% CI)           | P-value  | Case             | HR (95% CI) | P-value               |          |
| <b>Servings</b>          |                     |            |                       |          |                  |             |                       |          |
|                          | Baseline→Depression | 5453       | 1.2179(1.1299,1.3128) | 2.61e-07 | Baseline→Anxiety | 6763        | 1.1317(1.0561,1.2127) | 0.000451 |
|                          | Depression→Death    | 268        | 1.0600(0.7530,1.4922) | 0.738429 | Anxiety→Death    | 306         | 1.0025(0.7230,1.3900) | 0.988086 |
|                          | Baseline→Death      | 5070       | 1.1209(1.0354,1.2135) | 0.004802 | Baseline→Death   | 5032        | 1.1281(1.0418,1.2215) | 0.002988 |
| <b>Energy proportion</b> |                     |            |                       |          |                  |             |                       |          |
|                          | Baseline→Depression | 5453       | 1.1340(1.0513,1.2232) | 0.001137 | Baseline→Anxiety | 6763        | 1.1232(1.0485,1.2032) | 0.000942 |
|                          | Depression→Death    | 268        | 1.0607(0.7583,1.4837) | 0.730724 | Anxiety→Death    | 306         | 0.8129(0.5902,1.1197) | 0.204776 |
|                          | Baseline→Death      | 5070       | 1.1370(1.0492,1.2321) | 0.001733 | Baseline→Death   | 5032        | 0.9618(0.8868,1.0430) | 0.346164 |
| <b>Weight proportion</b> |                     |            |                       |          |                  |             |                       |          |
|                          | Baseline→Depression | 5453       | 1.2604(1.1675,1.3606) | 3.12e-09 | Baseline→Anxiety | 6763        | 1.1116(1.0375,1.1911) | 0.002671 |
|                          | Depression→Death    | 268        | 1.2381(0.8768,1.7483) | 0.225102 | Anxiety→Death    | 306         | 1.1233(0.8022,1.5730) | 0.498574 |
|                          | Baseline→Death      | 5070       | 1.1627(1.0728,1.2601) | 0.000240 | Baseline→Death   | 5032        | 1.1714(1.0808,1.2696) | 0.000118 |

Abbreviations: UPF, ultra-processed food; CI, confidence interval; HR, hazard ratio.

HR was calculated by the Cox model adjusted for age, sex, ethnicity, smoking, drinking, Townsend deprivation index, income, education, and physical activity.

**Supplementary Table 15.** Associations between UPF consumption and transitions from baseline to depression or anxiety, and then to cardiovascular disease mortality.

|                          |                     | Depression |                       |          | Anxiety          |             |                        |          |
|--------------------------|---------------------|------------|-----------------------|----------|------------------|-------------|------------------------|----------|
|                          |                     | Case       | HR (95% CI)           | P-value  |                  |             | P-value                |          |
|                          |                     | Case       | HR (95% CI)           | P-value  | Case             | HR (95% CI) | P-value                |          |
| <b>Servings</b>          |                     |            |                       |          |                  |             |                        |          |
|                          | Baseline→Depression | 5453       | 1.2179(1.1299,1.3128) | 2.61e-07 | Baseline→Anxiety | 6763        | 1.1317(1.05613,1.2127) | 0.000451 |
|                          | Depression→Death    | 99         | 0.8962(0.5258,1.5277) | 0.68722  | Anxiety→Death    | 70          | 1.2546(0.63791,2.4673) | 0.511049 |
|                          | Baseline→Death      | 1585       | 1.3404(1.1646,1.5427) | 4.41e-05 | Baseline→Death   | 1614        | 1.3111(1.14142,1.5060) | 0.000128 |
| <b>Energy proportion</b> |                     |            |                       |          |                  |             |                        |          |
|                          | Baseline→Depression | 5453       | 1.1340(1.0513,1.2232) | 0.001137 | Baseline→Anxiety | 6763        | 1.1254(1.0506,1.2056)  | 0.000768 |
|                          | Depression→Death    | 99         | 1.5741(0.9234,2.6834) | 0.095485 | Anxiety→Death    | 70          | 0.8923(0.4794,1.6606)  | 0.719090 |
|                          | Baseline→Death      | 1585       | 1.0819(0.9376,1.2484) | 0.281019 | Baseline→Death   | 1614        | 1.1204(0.9724,1.2909)  | 0.115800 |
| <b>Weight proportion</b> |                     |            |                       |          |                  |             |                        |          |
|                          | Baseline→Depression | 5453       | 1.2604(1.1675,1.3606) | 3.12e-09 | Baseline→Anxiety | 6763        | 1.1116(1.03745,1.1911) | 0.002671 |
|                          | Depression→Death    | 99         | 1.0372(0.5863,1.8347) | 0.900203 | Anxiety→Death    | 70          | 1.6690(0.85547,3.2561) | 0.133053 |
|                          | Baseline→Death      | 1585       | 1.3364(1.1605,1.5390) | 5.65e-05 | Baseline→Death   | 1614        | 1.3044(1.13397,1.5005) | 0.000200 |

Abbreviations: UPF, ultra-processed food; CI, confidence interval; HR, hazard ratio.

HR was calculated by the Cox model adjusted for age, sex, ethnicity, smoking, drinking, Townsend deprivation index, income, education, and physical activity.

**Supplementary Table 16.** The proportion of missing values

---

| <b>Variable</b>            | <b>The proportion of missing values</b> |
|----------------------------|-----------------------------------------|
| Age                        | 0.00%                                   |
| Sex                        | 0.00%                                   |
| Ethnicity                  | 0.32%                                   |
| Smoking status             | 0.27%                                   |
| Alcohol intake frequency   | 0.07%                                   |
| Townsend deprivation index | 0.12%                                   |
| Income                     | 10.32%                                  |
| Education level            | 0.45%                                   |
| Physical activity          | 15.06%                                  |

---

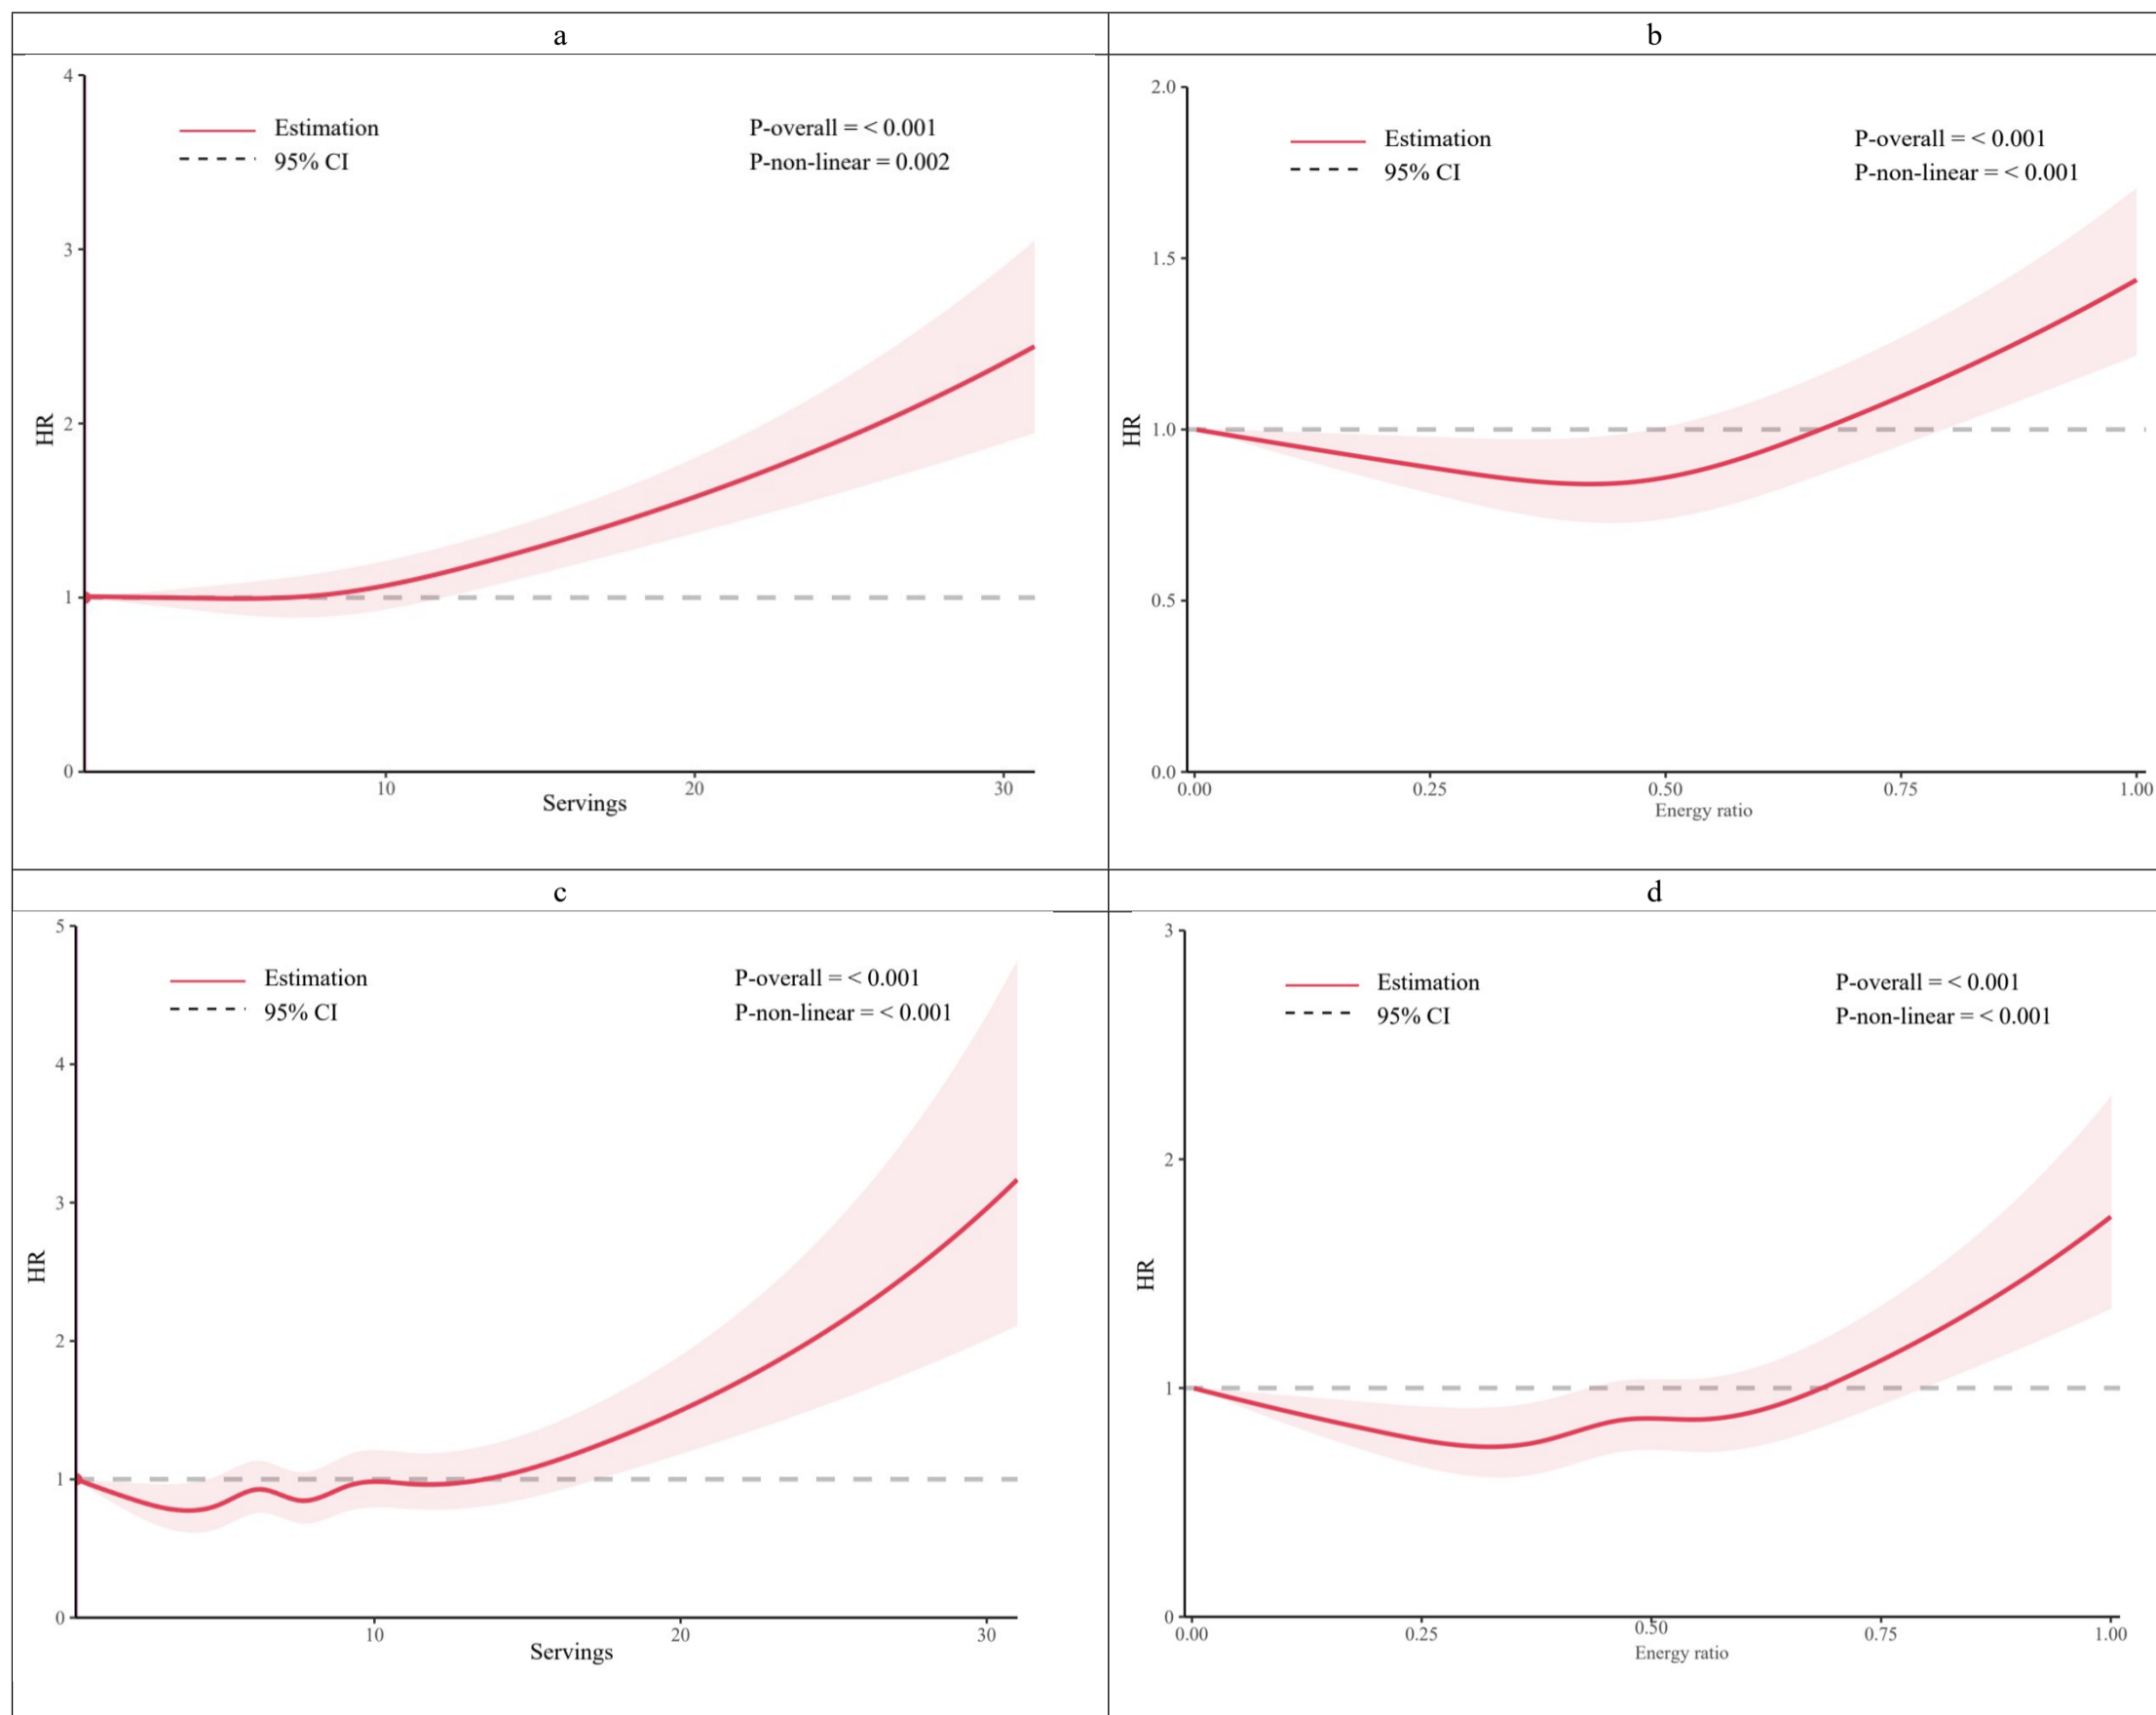

**Figure S1.** Restricted cubic spline analyses for the association of UPF consumption with depression(a-b), and anxiety(c-d).

Data are presented as hazard ratio (HR) and their 95% confidence interval (shaded areas).

(a)Associations of UPF servings with depression;

(b)Associations of UPF energy ratio with depression.

(c)Associations of UPF servings with anxiety;

(d)Associations of UPF energy ratio with anxiety;

Abbreviation: HR, hazard ratios; CI, confidence interval; UPF, ultra-processed food.

Models were adjusted for age, sex, ethnicity, physical activity, smoking status, alcohol intake frequency, before-tax household income, Townsend deprivation index, and education level.

## Reference

1. A. D. Elliott, D. Linz, R. Mishima, K. Kadhim, C. Gallagher, M. E. Middeldorp, C. V. Verdicchio, J. M. L. Hendriks, D. H. Lau, A. La Gerche and P. Sanders, Association between physical activity and risk of incident arrhythmias in 402 406 individuals: evidence from the UK Biobank cohort, *Eur Heart J*, 2020, **41**, 1479-1486.
2. K. M. Kendall, M. Bracher-Smith, H. Fitzpatrick, A. Lynham, E. Rees, V. Escott-Price, M. J. Owen, M. C. O'Donovan, J. T. R. Walters and G. Kirov, Cognitive performance and functional outcomes of carriers of pathogenic copy number variants: analysis of the UK Biobank, *Br J Psychiatry*, 2019, **214**, 297-304.
3. B. D. Jani, P. Hanlon, B. I. Nicholl, R. McQueenie, K. I. Gallacher, D. Lee and F. S. Mair, Relationship between multimorbidity, demographic factors and mortality: findings from the UK Biobank cohort, *BMC Med*, 2019, **17**, 74.
4. W. Hu, J. Chu, X. Chen, S. Liu, N. Sun, Q. Han, T. Li, Z. Feng, Q. He and Y. Shen, The role of depression and physical activity in the association of between sleep quality, and duration with and health-related quality of life among the elderly: a UK Biobank cross-sectional study, *BMC Geriatr*, 2022, **22**, 338.
5. Z. Zhang, X. Yang, Y. Jia, Y. Wen, S. Cheng, P. Meng, C. Li, H. Zhang, C. Pan, J. Zhang, Y. Chen and F. Zhang, Vitamin D and the Risks of Depression and Anxiety: An Observational Analysis and Genome-Wide Environment Interaction Study, *Nutrients*, 2021, **13**.
6. M. J. Azur, E. A. Stuart, C. Frangakis and P. J. Leaf, Multiple imputation by chained equations: what is it and how does it work?, *Int J Methods Psychiatr Res*, 2011, **20**, 40-49.
7. J. A. Sterne, I. R. White, J. B. Carlin, M. Spratt, P. Royston, M. G. Kenward, A. M. Wood and J. R. Carpenter, Multiple imputation for missing data in epidemiological and clinical research: potential and pitfalls, *BMJ*, 2009, **338**, b2393.
